# Supplementary material
Source: MDPI journal article supplement (https://www.mdpi.com/1999-4907/11/5/576)
Supplement: s1 [file s1]

## Supplementary Materials

**Table S1.** Commercial thinning schedule (assortment volume,  $\text{m}^3 \text{ha}^{-1}$ ) in stands with different initial densities (trees  $\text{ha}^{-1}$ ) and thinning criteria: KKC1—thinning is done when the relative stand density reaches 0.95 and is then reduced to 0.7; KKC2—thinning is done when the relative stand density reaches 0.95 and is then reduced to 0.45; KKC3—thinning is done when the relative stand density reaches 0.95, and in the first commercial thinning it is reduced to 0.45 and in the second thinning to 0.7.

| Precommercial Thinning Alternative | Stand Density after Precommercial Thinning, Spruces $\text{ha}^{-1}$ | Commerical Thinning Regime | Age, Years |    |    |    |    |     |     |
|------------------------------------|----------------------------------------------------------------------|----------------------------|------------|----|----|----|----|-----|-----|
|                                    |                                                                      |                            | 25         | 30 | 35 | 40 | 45 | 50  | 55  |
| Low density                        | 600                                                                  | KKC1                       |            |    |    |    |    |     |     |
|                                    |                                                                      | KKC2                       |            |    |    |    |    |     |     |
|                                    |                                                                      | KKC3                       |            |    |    |    |    |     |     |
|                                    | 700                                                                  | KKC1                       |            |    |    |    |    |     | 91  |
|                                    |                                                                      | KKC2                       |            |    |    |    |    |     | 91  |
|                                    |                                                                      | KKC3                       |            |    |    |    |    |     | 106 |
|                                    | 800                                                                  | KKC1                       |            |    |    |    |    |     | 91  |
|                                    |                                                                      | KKC2                       |            |    |    |    |    |     | 102 |
|                                    |                                                                      | KKC3                       |            |    |    |    |    |     | 111 |
|                                    | 900                                                                  | KKC1                       |            |    |    |    |    | 78  |     |
|                                    |                                                                      | KKC2                       |            |    |    |    |    | 98  |     |
|                                    |                                                                      | KKC3                       |            |    |    |    |    | 103 |     |
| Moderate density                   | 1000                                                                 | KKC1                       |            |    |    |    |    | 62  |     |
|                                    |                                                                      | KKC2                       |            |    |    |    |    | 88  |     |
|                                    |                                                                      | KKC3                       |            |    |    |    |    | 93  |     |
|                                    | 1100                                                                 | KKC1                       |            |    |    |    |    | 45  | 102 |
|                                    |                                                                      | KKC2                       |            |    |    |    |    | 75  |     |
|                                    |                                                                      | KKC3                       |            |    |    |    |    | 81  |     |
|                                    | 1200                                                                 | KKC1                       |            |    |    |    |    | 56  | 101 |
|                                    |                                                                      | KKC2                       |            |    |    |    |    | 86  |     |
|                                    |                                                                      | KKC3                       |            |    |    |    |    | 93  |     |
| 1300                               | KKC1                                                                 |                            |            |    |    |    | 62 | 101 |     |
|                                    | KKC2                                                                 |                            |            |    |    |    | 92 |     |     |
|                                    | KKC3                                                                 |                            |            |    |    |    | 99 |     |     |
| Unthinned                          | 1400                                                                 | KKC1                       |            |    |    |    |    | 42  | 66  |
|                                    |                                                                      | KKC2                       |            |    |    |    |    | 73  |     |
|                                    |                                                                      | KKC3                       |            |    |    |    |    | 82  |     |
|                                    | 1500                                                                 | KKC1                       |            |    |    |    |    | 49  | 66  |
|                                    |                                                                      | KKC2                       |            |    |    |    |    | 80  |     |
|                                    |                                                                      | KKC3                       |            |    |    |    |    | 89  |     |
|                                    | 1600                                                                 | KKC1                       |            |    |    |    |    | 29  | 64  |
|                                    |                                                                      | KKC2                       |            |    |    |    |    | 58  |     |
|                                    |                                                                      | KKC3                       |            |    |    |    |    | 69  |     |
|                                    | 1700                                                                 | KKC1                       |            |    |    |    |    | 34  | 64  |
|                                    |                                                                      | KKC2                       |            |    |    |    |    | 63  |     |
|                                    |                                                                      | KKC3                       |            |    |    |    |    | 74  |     |
